# Supplementary material
Source: PubMed Central journal article supplement (PMC7199733)
Supplement: mmc1.pdf [file mmc1.pdf]

**Cell, Volume 181**

## **Supplemental Information**

### **Structural Basis for Potent**

### **Neutralization of Betacoronaviruses**

### **by Single-Domain Camelid Antibodies**

**Daniel Wrapp, Dorien De Vlieger, Kizzmekia S. Corbett, Gretel M. Torres, Nianshuang Wang, Wander Van Breedam, Kenny Roose, Loes van Schie, VIB-CMB COVID-19 Response Team, Markus Hoffmann, Stefan Pöhlmann, Barney S. Graham, Nico Callewaert, Bert Schepens, Xavier Saelens, and Jason S. McLellan**

|                | Neutralization IC <sub>50</sub> (μg/mL) |                      |
|----------------|-----------------------------------------|----------------------|
|                | MERS-CoV<br>England 1                   | SARS-CoV-1<br>Urbani |
| D12 mAb (ctrl) | 0.01996                                 | >10                  |
| MERS VHH-2     | >10                                     | >10                  |
| MERS VHH-12    | 0.13                                    | >10                  |
| MERS VHH-15    | >10                                     | >10                  |
| MERS VHH-20    | >10                                     | >10                  |
| MERS VHH-34    | 2.9                                     | >10                  |
| MERS VHH-40    | 0.034                                   | >10                  |
| MERS VHH-55    | 0.014                                   | >10                  |
| SARS VHH-1     | >10                                     | >10                  |
| SARS VHH-6     | >10                                     | 0.14                 |
| SARS VHH-35    | >10                                     | >10                  |
| SARS VHH-44    | >10                                     | 5.5                  |
| SARS VHH-72    | >10                                     | >10                  |

|                             | VHH-72 + SARS-CoV-1 RBD                | VHH-55 + MERS-CoV RBD     |
|-----------------------------|----------------------------------------|---------------------------|
| PDB ID                      | 6WAQ                                   | 6WAR                      |
| <i>Data collection</i>      |                                        |                           |
| Space group                 | <i>P</i> 3 <sub>1</sub> 2 <sub>1</sub> | <i>C</i> 222 <sub>1</sub> |
| Cell dimensions             |                                        |                           |
| <i>a, b, c</i> (Å)          | 88.8, 88.8, 200.8                      | 150.0, 283.3, 173.7       |
| $\alpha, \beta, \gamma$ (°) | 90, 90, 120                            | 90, 90, 90                |
| Resolution (Å)              | 43.39-2.20 (2.28-2.20)                 | 66.30-3.40 (3.51-3.40)    |
| Rmerge                      | 0.179 (1.669)                          | 0.999 (3.752)             |
| I/ $\sigma$                 | 6.2 (1.5)                              | 6.2 (2.1)                 |
| CC1/2                       | 0.993 (0.865)                          | 0.485 (0.161)             |
| Completeness (%)            | 99.8 (99.9)                            | 98.5 (95.7)               |
| Redundancy                  | 8.9 (9.1)                              | 5.8 (5.1)                 |
| <i>Refinement</i>           |                                        |                           |
| Rwork/Rfree (%)             | 20.3/23.6                              | 21.4/26.8                 |
| No. atoms                   |                                        |                           |
| Protein                     | 4,934                                  | 20,270                    |
| Glycan (NAG)                | 42                                     | 42                        |
| Water                       | 102                                    | 0                         |
| Average B-factors           |                                        |                           |
| Protein                     | 78.5                                   | 84.3                      |
| Ligands                     | 78.8                                   | 84.3                      |
| Ligands                     | 92.5                                   | 115.7                     |
| R.m.s. deviations           |                                        |                           |
| Bond lengths (Å)            | 0.01                                   | 0.007                     |
| Bond angles (°)             | 0.76                                   | 1.05                      |
| Ramachandran                |                                        |                           |
| Favored (%)                 | 95.8                                   | 97.1                      |
| Allowed (%)                 | 4.2                                    | 2.5                       |
| Outliers (%)                | 0.0                                    | 0.4                       |

**Supplementary Table 2:** X-ray crystallography data collection and refinement statistics. Related to Figures 2 and 3.
